# Supplementary material
Source: PubMed Central journal article supplement (PMC7396128)
Supplement: NIHMS1615437-supplement-Supplementary_Fig__1.pdf [file NIHMS1615437-supplement-Supplementary_Fig__1.pdf]

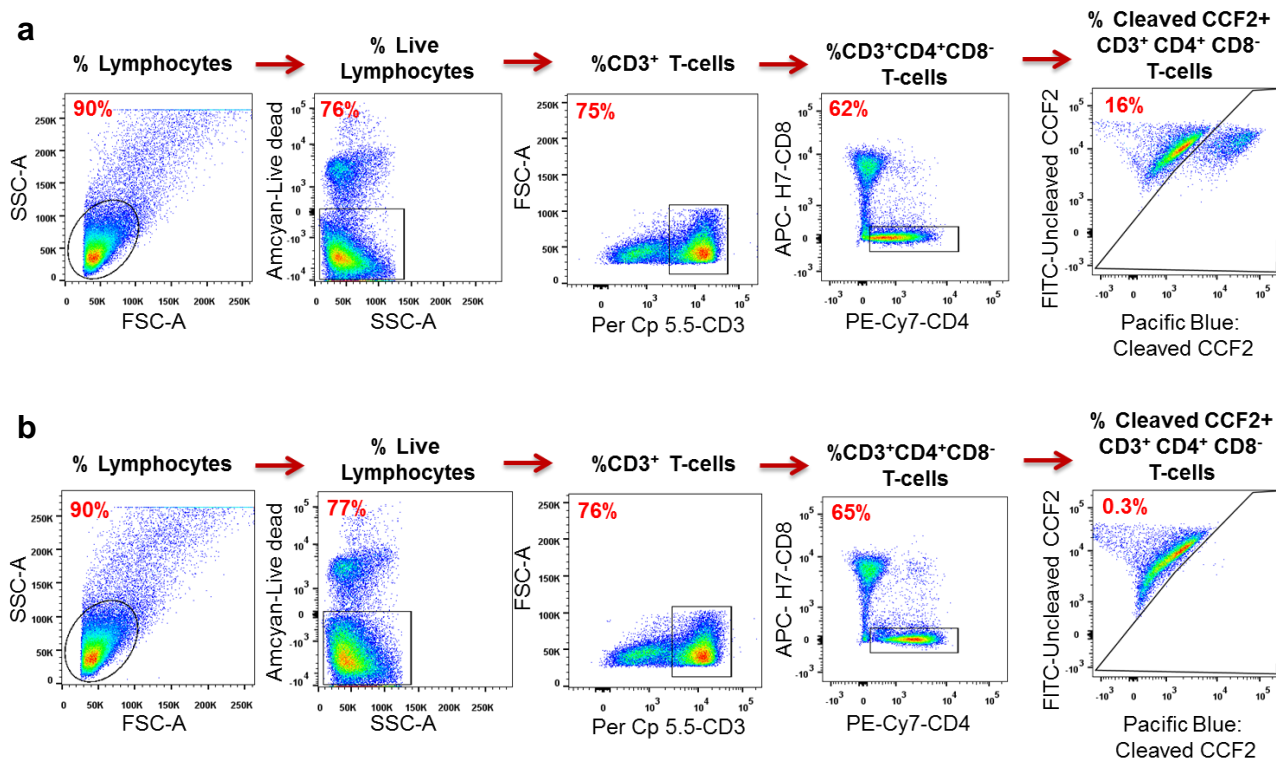

**Supplementary Fig. 1. Flow cytometry gating strategy for HIV-1 entry studies.** **a**, Representative enumeration of mock-treated PBMC sample infected with BlaM-Vpr/HIV-1. **b**, Representative enumeration of mock-treated uninfected PBMC sample. Data obtained from duplicate cell cultures in each of 3 independent PBMC donors within a single experiment.
