# Supplementary material
Source: PubMed Central journal article supplement (PMC7396128)
Supplement: NIHMS1615437-supplement-Supplementary_Table_1.pdf [file NIHMS1615437-supplement-Supplementary_Table_1.pdf]

**Supplementary Table 1. Antiviral activity and selectivity of GS-CA1 and representative control antiretroviral agents in primary human T-cells and macrophages**

| Primary Human Target Cell    | Parameter                                             | GS-CA1      | EFV (NNRTI) | DTG (INSTI) | ATV (PI)    |
|------------------------------|-------------------------------------------------------|-------------|-------------|-------------|-------------|
| CD4+ T-lymphocytes           | Antiviral Activity EC <sub>50</sub> (nM) <sup>a</sup> | 0.06 ± 0.01 | 1.23 ± 1.10 | 0.96 ± 0.38 | 6.88 ± 5.69 |
|                              | Cytotoxicity CC <sub>50</sub> (μM) <sup>a</sup>       | > 50.0      | 17.4 ± 6.8  | 15.8 ± 3.9  | 29.8 ± 16.7 |
|                              | Selectivity Index (SI) <sup>b</sup>                   | > 833,330   | 14,150      | 16,460      | 4,330       |
| Monocyte-derived macrophages | Antiviral Activity EC <sub>50</sub> (nM) <sup>a</sup> | 0.10 ± 0.07 | 0.29 ± 0.22 | 1.87 ± 0.31 | 8.31 ± 4.99 |
|                              | Cytotoxicity CC <sub>50</sub> (μM) <sup>a</sup>       | > 50.0      | 22.2 ± 14.1 | 34.7 ± 21.6 | 36.6 ± 23.1 |
|                              | Selectivity Index (SI) <sup>b</sup>                   | > 1,670,000 | 76,200      | 18,560      | 4,400       |

NNRTI = nonnucleoside reverse transcriptase inhibitor; INSTI = integrase strand transfer inhibitor; PI = protease inhibitor

<sup>a</sup> EC<sub>50</sub> (HIV-1<sub>BaL</sub>-infected) and CC<sub>50</sub> (mock-infected) values (mean ± s.d.) obtained from quadruplicate cell cultures in each of 3 independent experiments

<sup>b</sup> SI = CC<sub>50</sub>/EC<sub>50</sub> ratio
