# Supplementary material
Source: PubMed Central journal article supplement (PMC7396128)
Supplement: NIHMS1615437-supplement-Supplementary_Table_3.pdf [file NIHMS1615437-supplement-Supplementary_Table_3.pdf]

**Supplementary Table 3. Effect of MOI on GS-CA1 antiviral activity in a T-cell line**

| Multiplicity of Infection (MOI) | EC <sub>50</sub> (nM) <sup>a</sup> |             |             |             |             |
|---------------------------------|------------------------------------|-------------|-------------|-------------|-------------|
|                                 | GS-CA1                             | TAF         | EFV         | DTG         | DRV         |
| 0.01                            | 0.034 ± 0.014                      | 10.0 ± 4.5  | 0.69 ± 0.30 | 0.31 ± 0.13 | 1.36 ± 1.46 |
| 0.05                            | 0.062 ± 0.027                      | 12.8 ± 7.9  | 1.15 ± 0.34 | 0.50 ± 0.22 | 1.33 ± 0.70 |
| 0.25                            | 0.160 ± 0.062                      | 50.5 ± 48.5 | 2.79 ± 1.73 | 1.57 ± 1.10 | 2.67 ± 2.42 |
| 1.25                            | 0.452 ± 0.174                      | 61.1 ± 25.0 | 6.26 ± 1.22 | 2.46 ± 1.01 | 3.84 ± 1.60 |

<sup>a</sup> EC<sub>50</sub> values (mean ± s.d.) obtained from triplicate cell cultures in each of 4 independent experiments. CEM-NK<sup>R</sup> CCR5+Luc+ cells were infected with NL4-3-JRFL-secNLuc reporter HIV-1 at the indicated MOIs, treated with a dose-response of each inhibitor and developed with Nano-Glo Luciferase Assay reagent after 5 days of culture.

TAF = tenofovir alafenamide; EFV = efavirenz; DTG = dolutegravir; DRV = darunavir
